# Supplementary material
Source: publisher figshare collection journal article supplement (https://tandf.figshare.com/ndownloader/files/21665991)
Supplement: Supplementary file 1 [file 21665991]

**Supplementary material**

**Table S1.** Means ± standard deviations of skin histological measurements in the four experimental groups (n = 7 each).

| **Variables** | **Control** | **Paricalcitol** | **RF** | **RF+Paricalcitol** | |
| --- | --- | --- | --- | --- | --- |
| Epidermis thickness  (µm) | 35.8 ± 10.3 | 33.2 ± 7.1 | 36.4 ± 7.8 | | 34.6 ± 6.9 |
| Collagen bundel thickness (µm) | 12.4 ± 2.8 | 11.5 ± 3.2 | 4.9 ± 1.1**a,b,c** | | 10.3 ± 2.1 |
| Mast cell number (/MPF) | 3.6 ± 0.7 | 4.3 ± 1.1 | 7.4 ± 1.2**a,b,c** | | 4.3 ± 0.4 |

**a** p<0.05, significantly different from control group,**b**p<0.05, significantly different from paricalcitol group, **c**p<0.05, significantly different from RF+paricalcitol group
